# Supplementary material for: Beyond the EDGE with EDAM: Prioritising British Plant Species According to Evolutionary Distinctiveness, and Accuracy and Magnitude of Decline
Source: PubMed Central journal article supplement (PMC4446313; doi:10.1371/journal.pone.0126524), 2015-05-27
Supplement: pone.0126524.s001.pdf [file pone.0126524.s001.pdf]

Correlation with 1% Quantile

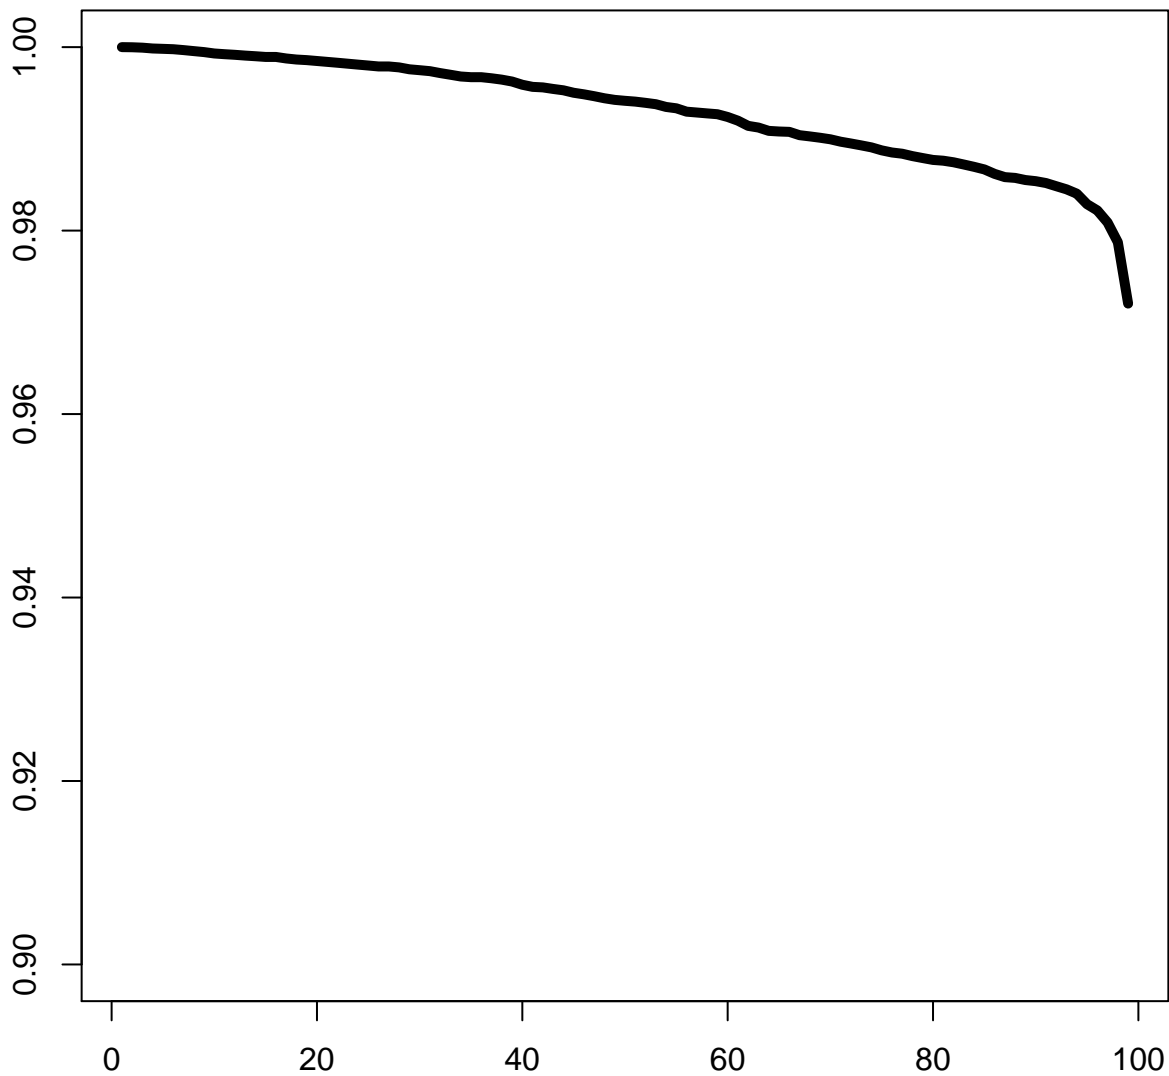

Quantile of Genus Age
